# Supplementary material for: Adolescent school injuries and classroom sex compositions in German secondary schools
Source: Springer Nature journal article supplement (doi:10.1186/s12889-021-12370-8), 2022-01-10
Supplement: MOESM1 [file 20016682]

# Adolescent school injuries and classroom sex compositions in German secondary schools

Supplementary Material 1

## 1 Figures

**Figure S1: Class-level response rates and classroom shares of male students by wave, GUS data 2018-2019.**

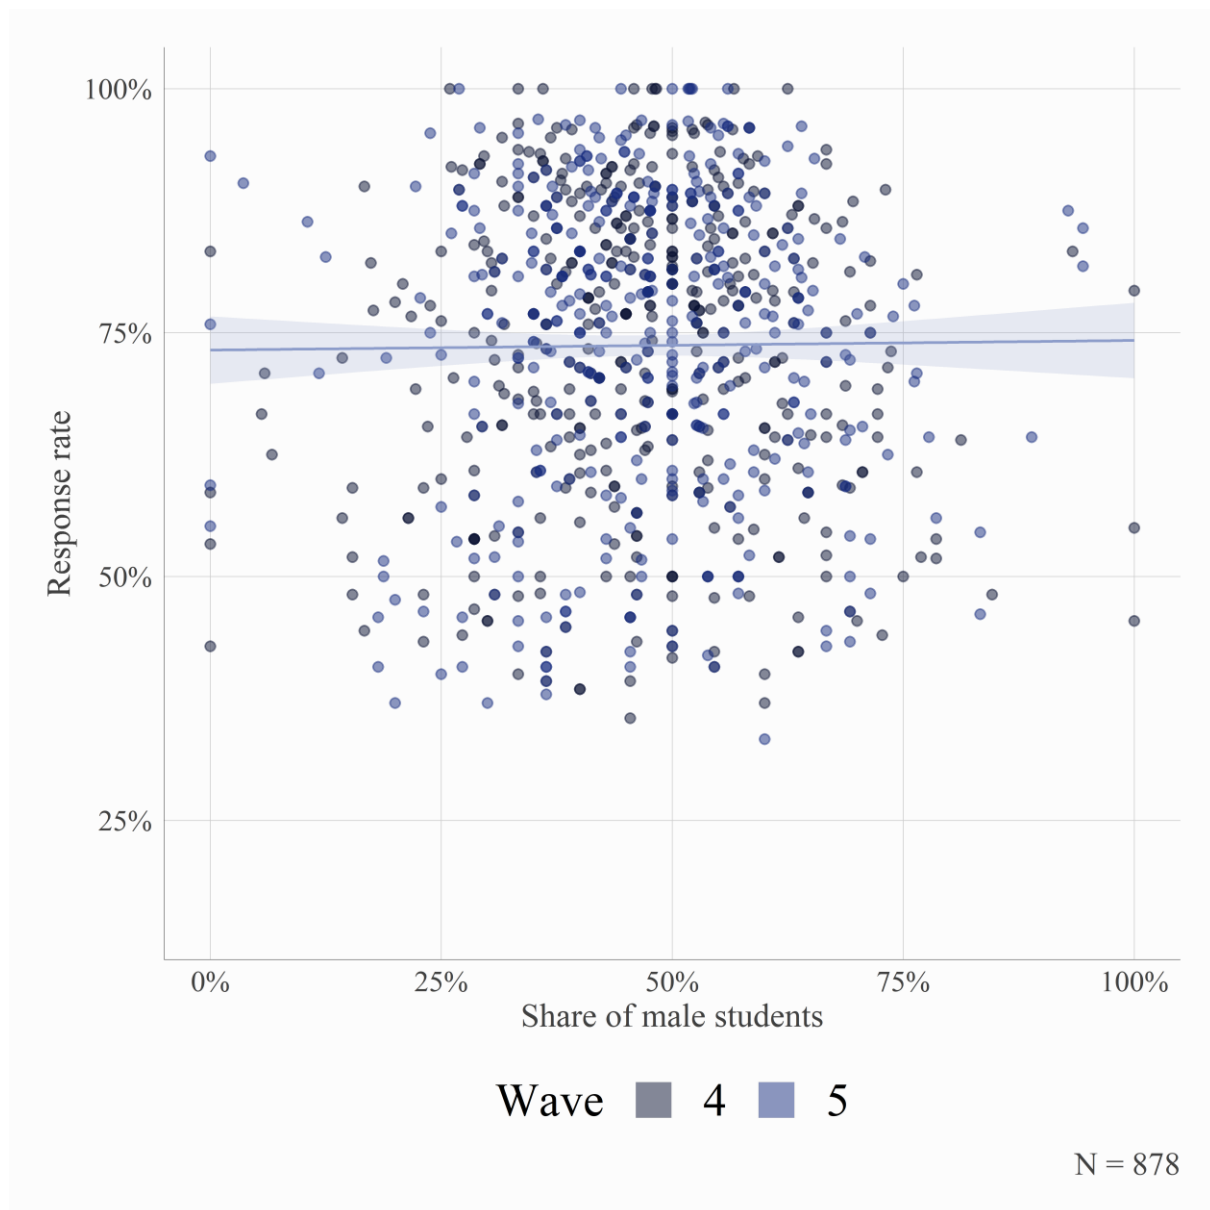

**Figure S2: Adjusted predictions for school injury from bivariate multilevel logistic regression. Students from 8th and 9th grade, GUS data 2018-2019.**

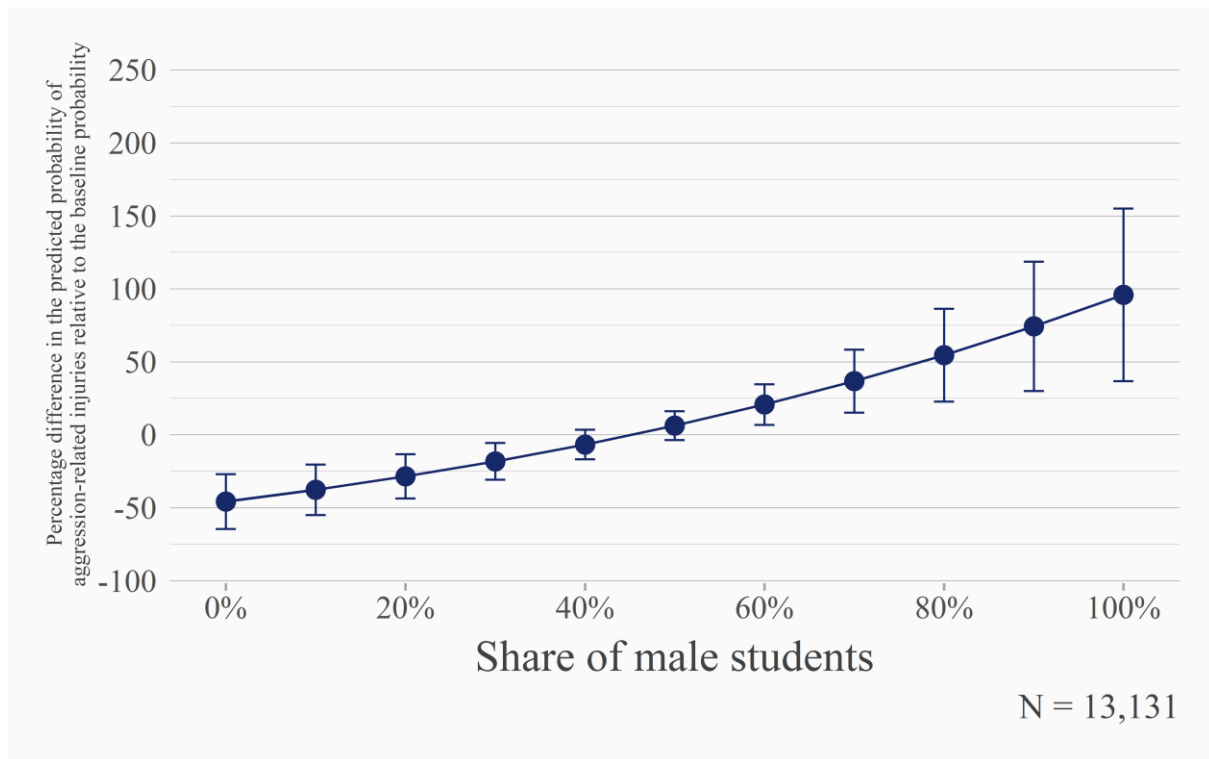

**Figure S3: Adjusted predictions for school injury from multilevel logistic regression including an interaction term for sex. Students from 8<sup>th</sup> and 9<sup>th</sup> grade, GUS data 2018-2019.**

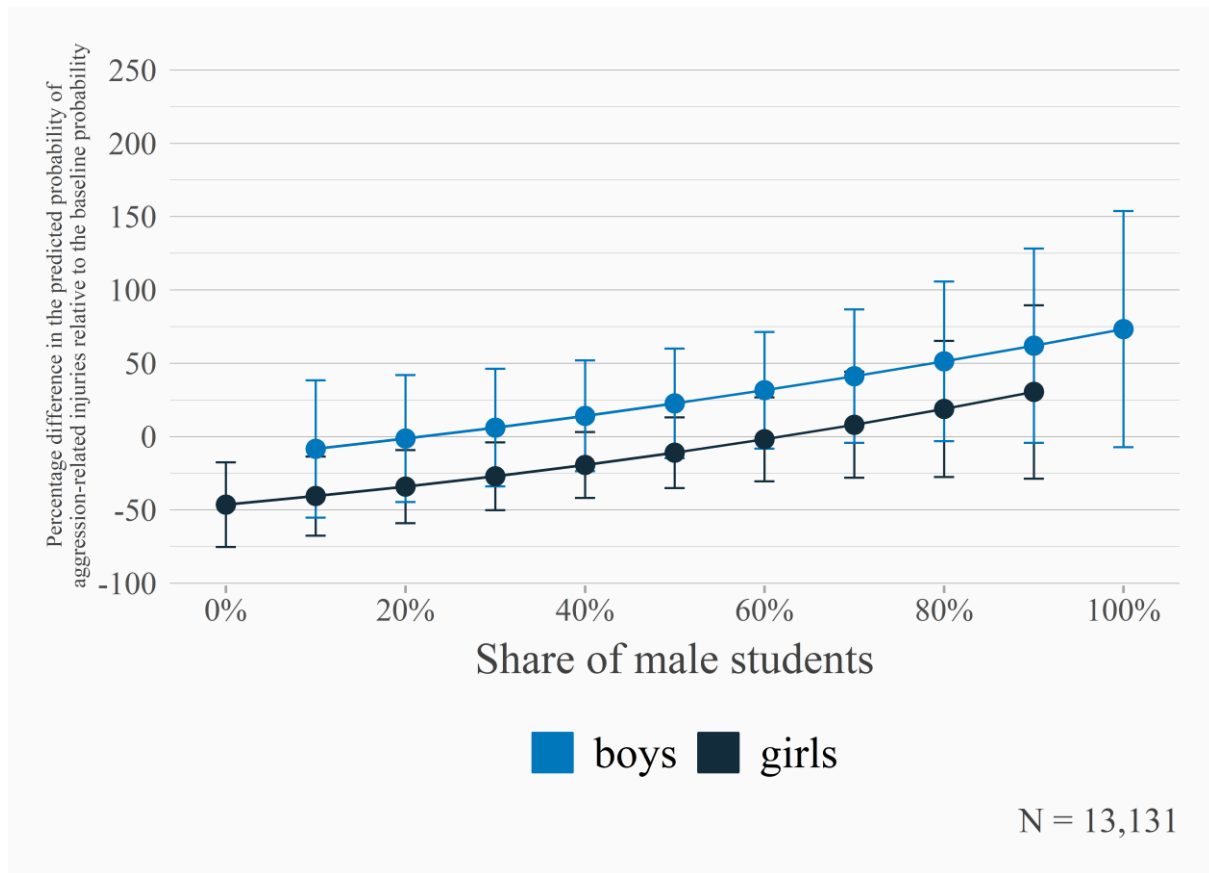

**Figure S4: Adjusted predictions for school injury from aggression from bivariate multilevel logistic regression. Students from 8<sup>th</sup> and 9<sup>th</sup> grade, GUS data 2018-2019.**

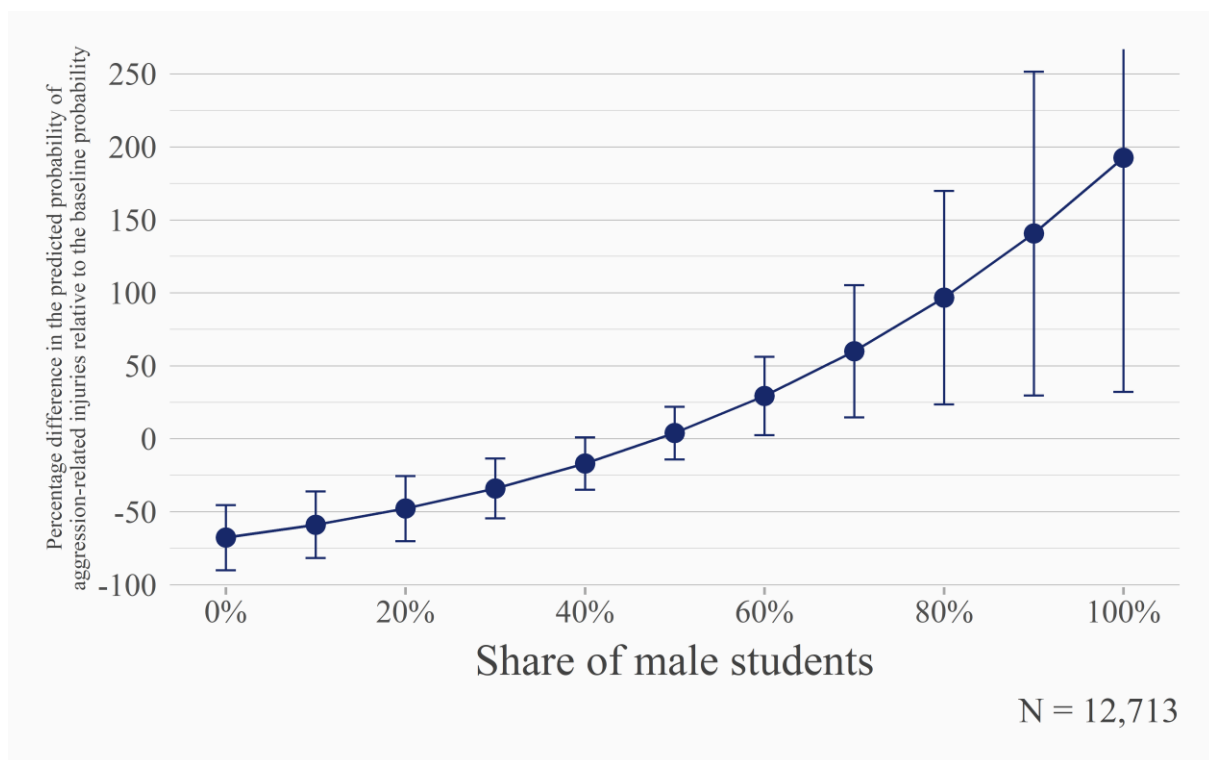

**Figure S5: Adjusted predictions for school injury from aggression from multilevel logistic regression including an interaction term for sex. Students from 8<sup>th</sup> and 9<sup>th</sup> grade, GUS data 2018-2019.**

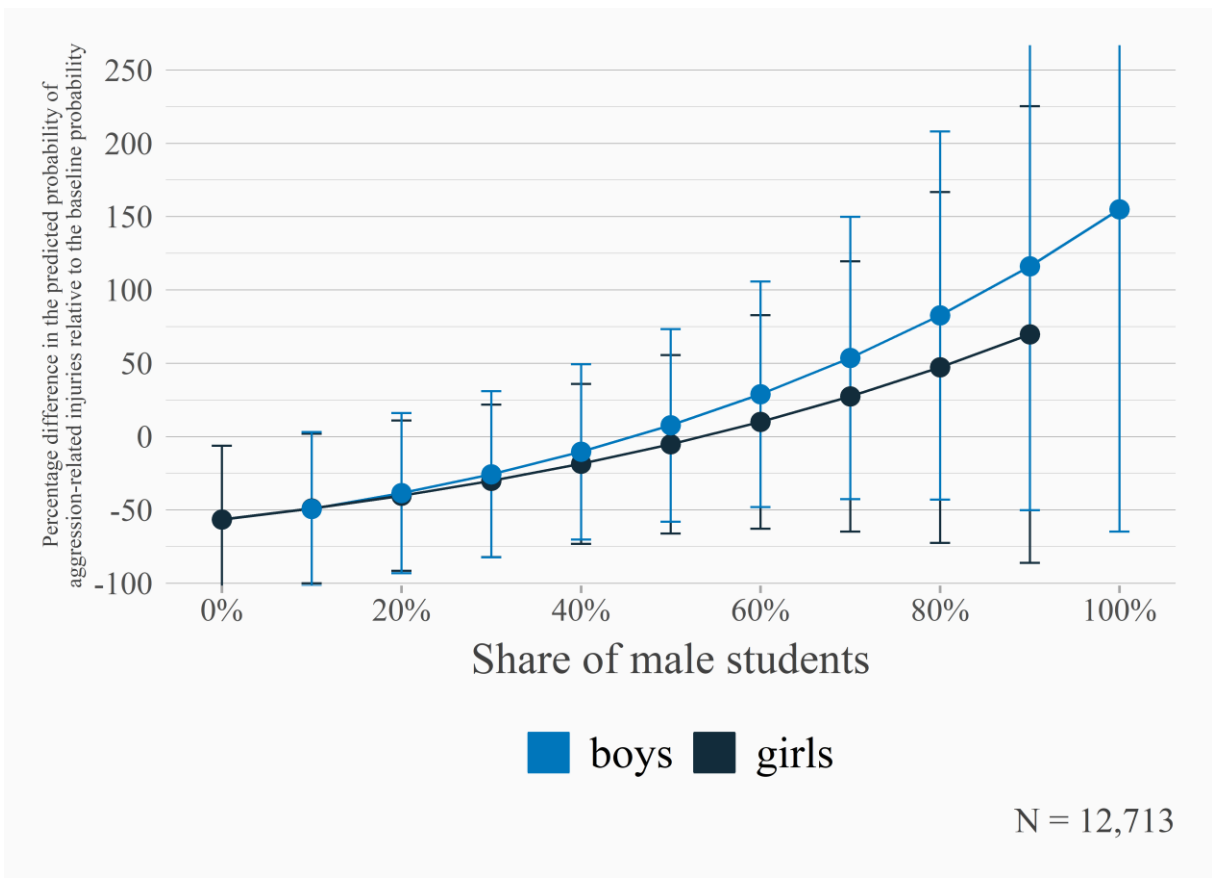

## 2 Tables

**Table S1: Odds Ratios from bivariate multilevel logistic regression predicting the risk of injury on the school premises. Students from 8<sup>th</sup> and 9<sup>th</sup> grade, GUS data 2018-2019.**

|             | Variable                              | OR         | se     | p     | 95% CI |       |
|-------------|---------------------------------------|------------|--------|-------|--------|-------|
| Fixed part  | Classroom sex ratio (% male students) | 1.017      | 0.0044 | <.001 | 1.009  | 1.026 |
|             | Constant                              | 0.0051     | 0.0018 |       |        |       |
| Random part | $\sigma^2$                            | 0.321      | 0.128  |       | 0.147  | 0.701 |
|             | $\tau^2$                              | 3.423      | 0.735  |       | 2.247  | 5.215 |
|             | LogLikelihood                         | -2,329.425 |        |       |        |       |
|             | N(students)                           | 9,204      |        |       |        |       |
|             | N(class)                              | 520        |        |       |        |       |
|             | N                                     | 13,131     |        |       |        |       |

Models include individual- and aggregate-level variables as fixed effects and the respective class and person identifier as random effects. The terms  $\sigma^2$  and  $\tau^2$  represent the variance between classes and individuals, respectively.

**Table S2: Odds Ratios from multilevel logistic regression predicting the risk of injury on the school premises. Students from 8<sup>th</sup> and 9<sup>th</sup> grade, GUS data 2018-2019.**

|            | Variable                              | OR          | se     | p     | 95% CI |       |       |
|------------|---------------------------------------|-------------|--------|-------|--------|-------|-------|
| Fixed part | Classroom sex ratio (% male students) | 1.012       | 0.0046 | 0.012 | 1.003  | 1.021 |       |
|            | Class size                            | 0.996       | 0.02   | 0.853 | 0.958  | 1.036 |       |
|            | Class mean of family wealth           | 0.877       | 0.063  | 0.069 | 0.761  | 1.010 |       |
|            | Basic/intermediate secondary school   | <i>Ref.</i> |        |       |        |       |       |
|            | Upper secondary school                | 0.621       | 0.099  | 0.003 | 0.455  | 0.847 |       |
|            | West German school                    | <i>Ref.</i> |        |       |        |       |       |
|            | East German school                    | 1.056       | 0.195  | 0.768 | 0.735  | 1.517 |       |
|            | Urban school                          | <i>Ref.</i> |        |       |        |       |       |
|            | Rural school                          | 0.908       | 0.143  | 0.539 | 0.667  | 1.236 |       |
|            | Sex: Female                           | <i>Ref.</i> |        |       |        |       |       |
|            | Sex: Male                             | 1.793       | 0.224  | <.001 | 1.402  | 2.291 |       |
|            | Migrant background: No                | <i>Ref.</i> |        |       |        |       |       |
|            | Migrant background: Yes               | 1.368       | 0.179  | 0.017 | 1.059  | 1.767 |       |
|            | Mental health                         | 0.521       | 0.039  | <.001 | 0.449  | 0.604 |       |
|            | Family wealth                         | 1.417       | 0.130  | <.001 | 1.184  | 1.696 |       |
|            | 8th grade                             | <i>Ref.</i> |        |       |        |       |       |
|            | 9th grade                             | 0.464       | 0.052  | <.001 | 0.372  | 0.579 |       |
|            | Constant                              | 0.02        | 0.015  |       |        |       |       |
|            | Random part                           | $\sigma^2$  | 0.258  | 0.123 |        | 0.101 | 0.658 |
|            |                                       | $\tau^2$    | 3.414  | 0.751 |        | 2.218 | 5.256 |
|            | LogLikelihood                         | -2,243.896  |        |       |        |       |       |
|            | N(students)                           | 9,204       |        |       |        |       |       |
|            | N(class)                              | 520         |        |       |        |       |       |
|            | N                                     | 13,131      |        |       |        |       |       |

Models include individual- and aggregate-level variables as fixed effects and the respective class and the person identifier as random effects. The terms  $\sigma^2$  and  $\tau^2$  represent the variance between classes and individuals, respectively.

**Table S3: Odds Ratios from multilevel logistic regression predicting the risk of injury on the school premises. Students from 8<sup>th</sup> and 9<sup>th</sup> grade, GUS data 2018-2019.**

|            | Variable                              | OR          | se     | p     | 95% CI |        |
|------------|---------------------------------------|-------------|--------|-------|--------|--------|
| Fixed part | Classroom sex ratio (% male students) | 1.013       | 0.0063 | 0.037 | 1.001  | 1.026  |
|            | Male × Classroom SR                   | 0.997       | 0.0084 | 0.713 | 0.981  | 1.013  |
|            | Class size                            | 0.996       | 0.02   | 0.845 | 0.958  | 1.036  |
|            | Class mean of family wealth           | 0.878       | 0.063  | 0.072 | 0.763  | 1.012  |
|            | Basic/intermediate secondary school   | <i>Ref.</i> |        |       |        |        |
|            | Upper secondary school                | 0.620       | 0.098  | 0.003 | 0.455  | 0.846  |
|            | West German school                    | <i>Ref.</i> |        |       |        |        |
|            | East German school                    | 1.060       | 0.195  | 0.750 | 0.739  | 1.521  |
|            | Urban school                          | <i>Ref.</i> |        |       |        |        |
|            | Rural school                          | 0.906       | 0.142  | 0.531 | 0.666  | 1.233  |
|            | Sex: Female                           | <i>Ref.</i> |        |       |        |        |
|            | Sex: Male                             | 1.801       | 1.063  | 0.319 | 0.566  | 5.730  |
|            | Migrant background: No                | <i>Ref.</i> |        |       |        |        |
|            | Migrant background: Yes               | 1.368       | 0.178  | 0.016 | 1.060  | 1.766  |
|            | Mental health                         | 0.522       | 0.039  | <.001 | 0.450  | 0.605  |
|            | Family wealth                         | 1.414       | 0.130  | <.001 | 1.181  | 1.692  |
|            | 8 <sup>th</sup> grade                 | <i>Ref.</i> |        |       |        |        |
|            | 9 <sup>th</sup> grade                 | 0.465       | 0.052  | <.001 | 0.373  | 0.580  |
|            | Constant                              | 0.02        | 0.016  |       |        |        |
|            | Random part                           | $\sigma^2$  | 0.252  | 0.122 |        | 0.097  |
| $\tau^2$   |                                       | 3.151       | 1.038  |       | 1.653  | 6.008  |
| $\nu^2$    |                                       | 0.462       | 1.156  |       | 0.0034 | 62.442 |
|            | LogLikelihood                         | -2,243.657  |        |       |        |        |
|            | N(students)                           | 9,204       |        |       |        |        |
|            | N(class)                              | 520         |        |       |        |        |
|            | N                                     | 13,131      |        |       |        |        |

Models include individual- and aggregate-level variables as fixed effects and the respective class and person identifier as random effects. The terms  $\sigma^2$  and  $\tau^2$  represent the variance between classes and individuals, respectively. The term  $\nu^2$  represents the random slope for individual sex. Including a random slope for the lower-level variable is recommended for cross-level interactions (see Methods section).

**Table S4: Odds Ratios from bivariate multilevel logistic regression predicting the risk of injury from aggression on the school premises. Students from 8<sup>th</sup> and 9<sup>th</sup> grade, GUS data 2018-2019.**

|             | Variable                              | OR       | se      | p     | 95% CI |       |
|-------------|---------------------------------------|----------|---------|-------|--------|-------|
| Fixed part  | Classroom sex ratio (% male students) | 1.028    | 0.0081  | <.001 | 1.012  | 1.044 |
|             | Constant                              | 0.00031  | 0.00022 |       |        |       |
| Random part | $\sigma^2$                            | 0.642    | 0.361   |       | 0.213  | 1.931 |
|             | $\tau^2$                              | 5.018    | 1.310   |       | 3.008  | 8.371 |
|             | LogLikelihood                         | -836.359 |         |       |        |       |
|             | N(students)                           | 8,962    |         |       |        |       |
|             | N(class)                              | 520      |         |       |        |       |
|             | N                                     | 12,713   |         |       |        |       |

Models include individual- and aggregate-level variables as fixed effects and the respective class and person identifier as random effects. The terms  $\sigma^2$  and  $\tau^2$  represent the variance between classes and individuals, respectively.

**Table S5: Odds Ratios from multilevel logistic regression predicting the risk of injury from aggression on the school premises. Students from 8<sup>th</sup> and 9<sup>th</sup> grade, GUS data 2018-2019.**

|            | Variable                              | OR          | se      | p     | 95% CI |       |       |
|------------|---------------------------------------|-------------|---------|-------|--------|-------|-------|
| Fixed part | Classroom sex ratio (% male students) | 1.022       | 0.0086  | 0.010 | 1.005  | 1.039 |       |
|            | Class size                            | 1.043       | 0.038   | 0.252 | 0.970  | 1.121 |       |
|            | Class mean of family wealth           | 1.103       | 0.146   | 0.459 | 0.851  | 1.429 |       |
|            | Basic/intermediate secondary school   | <i>Ref.</i> |         |       |        |       |       |
|            | Upper secondary school                | 0.315       | 0.094   | <.001 | 0.176  | 0.566 |       |
|            | West German school                    | <i>Ref.</i> |         |       |        |       |       |
|            | East German school                    | 1.700       | 0.553   | 0.103 | 0.898  | 3.216 |       |
|            | Urban school                          | <i>Ref.</i> |         |       |        |       |       |
|            | Rural school                          | 0.697       | 0.197   | 0.202 | 0.401  | 1.213 |       |
|            | Sex: Female                           | <i>Ref.</i> |         |       |        |       |       |
|            | Sex: Male                             | 2.038       | 0.475   | 0.002 | 1.291  | 3.218 |       |
|            | Migrant background: No                | <i>Ref.</i> |         |       |        |       |       |
|            | Migrant background: Yes               | 1.697       | 0.411   | 0.029 | 1.056  | 2.726 |       |
|            | Mental health                         | 0.560       | 0.075   | <.001 | 0.431  | 0.727 |       |
|            | Family wealth                         | 1.566       | 0.270   | 0.009 | 1.117  | 2.196 |       |
|            | 8th grade                             | <i>Ref.</i> |         |       |        |       |       |
|            | 9th grade                             | 0.378       | 0.081   | <.001 | 0.249  | 0.575 |       |
|            | Constant                              | 0.00032     | 0.00048 |       |        |       |       |
|            | Random part                           | $\sigma^2$  | 0.528   | 0.357 |        | 0.140 | 1.986 |
|            |                                       | $\tau^2$    | 5.146   | 1.413 |        | 3.004 | 8.815 |
|            | LogLikelihood                         | -799.716    |         |       |        |       |       |
|            | N(students)                           | 8,962       |         |       |        |       |       |
|            | N(class)                              | 520         |         |       |        |       |       |
|            | N                                     | 12,713      |         |       |        |       |       |

Models include individual- and aggregate-level variables as fixed effects and the respective class and the person identifier as random effects. The terms  $\sigma^2$  and  $\tau^2$  represent the variance between classes and individuals, respectively.

**Table S6: Odds Ratios from multilevel logistic regression predicting the risk of injury from aggression on the school premises. Students from 8<sup>th</sup> and 9<sup>th</sup> grade, GUS data 2018-2019.**

|            | Variable                              | OR          | se      | p     | 95% CI |        |
|------------|---------------------------------------|-------------|---------|-------|--------|--------|
| Fixed part | Classroom sex ratio (% male students) | 1.020       | 0.012   | 0.100 | 0.996  | 1.044  |
|            | Male × Classroom SR                   | 1.004       | 0.016   | 0.784 | 0.973  | 1.036  |
|            | Class size                            | 1.043       | 0.039   | 0.258 | 0.969  | 1.123  |
|            | Class mean of family wealth           | 1.098       | 0.147   | 0.487 | 0.844  | 1.427  |
|            | Basic/intermediate secondary school   | <i>Ref.</i> |         |       |        |        |
|            | Upper secondary school                | 0.310       | 0.094   | <.001 | 0.171  | 0.562  |
|            | West German school                    | <i>Ref.</i> |         |       |        |        |
|            | East German school                    | 1.734       | 0.571   | 0.095 | 0.909  | 3.307  |
|            | Urban school                          | <i>Ref.</i> |         |       |        |        |
|            | Rural school                          | 0.695       | 0.199   | 0.204 | 0.396  | 1.218  |
|            | Sex: Female                           | <i>Ref.</i> |         |       |        |        |
|            | Sex: Male                             | 0.950       | 1.118   | 0.965 | 0.094  | 9.550  |
|            | Migrant background: No                | <i>Ref.</i> |         |       |        |        |
|            | Migrant background: Yes               | 1.740       | 0.431   | 0.025 | 1.071  | 2.826  |
|            | Mental health                         | 0.558       | 0.076   | <.001 | 0.428  | 0.728  |
|            | Family wealth                         | 1.586       | 0.280   | 0.009 | 1.122  | 2.241  |
|            | 8 <sup>th</sup> grade                 | <i>Ref.</i> |         |       |        |        |
|            | 9 <sup>th</sup> grade                 | 0.373       | 0.081   | <.001 | 0.244  | 0.571  |
|            | Constant                              | 0.0004      | 0.00064 |       |        |        |
|            | Random part                           | $\sigma^2$  | 0.496   | 0.363 |        | 0.118  |
| $\tau^2$   |                                       | 4.746       | 1.789   |       | 2.267  | 9.934  |
| $\nu^2$    |                                       | 1.653       | 2.278   |       | 0.111  | 24.640 |
|            | LogLikelihood                         | -799.299    |         |       |        |        |
|            | N(students)                           | 8,962       |         |       |        |        |
|            | N(class)                              | 520         |         |       |        |        |
|            | N                                     | 12,713      |         |       |        |        |

Models include individual- and aggregate-level variables as fixed effects and the respective class and person identifier as random effects. The terms  $\sigma^2$  and  $\tau^2$  represent the variance between classes and individuals, respectively. The term  $\nu^2$  represents the random slope for individual sex. Including a random slope for the lower-level variable is recommended for cross-level interactions (see Methods section).
